# Supplementary material
Source: HighWire-hosted journal article supplement (https://bmjopen.bmj.com/content/14/12/e090393)
Supplement: inline-supplementary-material-3 [file inline-supplementary-material-3.pdf]

Supplementary Material 3

Study selection criteria

|                                                                                                                                                                                                                                                                                                                                                                                                                                                                                                                                                                         |
|-------------------------------------------------------------------------------------------------------------------------------------------------------------------------------------------------------------------------------------------------------------------------------------------------------------------------------------------------------------------------------------------------------------------------------------------------------------------------------------------------------------------------------------------------------------------------|
| POPULATION                                                                                                                                                                                                                                                                                                                                                                                                                                                                                                                                                              |
| <ul style="list-style-type: none"><li>Adults (≥18 years) with OPC who have completed treatment with curative intent.</li></ul>                                                                                                                                                                                                                                                                                                                                                                                                                                          |
| INDEX AND COMPARATOR MODELS                                                                                                                                                                                                                                                                                                                                                                                                                                                                                                                                             |
| <ul style="list-style-type: none"><li>Models that combined two or more prognostic factors in a statistical model to predict an individual's risk of the outcome.</li><li>Models that included one or more clinical variables (e.g. age, sex, tumour staging parameters, smoking/alcohol consumption, HPV status) with or without additional genetic or radiomics variables.</li></ul> <p><i>Models with only genetic or radiomics variables were excluded.</i></p>                                                                                                      |
| OUTCOME                                                                                                                                                                                                                                                                                                                                                                                                                                                                                                                                                                 |
| <ul style="list-style-type: none"><li>Any recurrence or survival related outcomes (e.g. recurrence-free survival, overall survival).</li></ul>                                                                                                                                                                                                                                                                                                                                                                                                                          |
| TIMING                                                                                                                                                                                                                                                                                                                                                                                                                                                                                                                                                                  |
| <ul style="list-style-type: none"><li>Models to be applied after treatment with curative intent; any time horizon for outcome prediction.</li></ul>                                                                                                                                                                                                                                                                                                                                                                                                                     |
| SETTING/ROLE                                                                                                                                                                                                                                                                                                                                                                                                                                                                                                                                                            |
| <ul style="list-style-type: none"><li>Risk stratification in secondary care.</li></ul>                                                                                                                                                                                                                                                                                                                                                                                                                                                                                  |
| STUDY DESIGN                                                                                                                                                                                                                                                                                                                                                                                                                                                                                                                                                            |
| <ul style="list-style-type: none"><li>Studies of models which were externally validated at least once regardless of whether they were internally validated.</li><li>External validation was defined as validation in a separate patient cohort from a different institution/database than the development cohort.</li><li>Development (only) studies where the model was externally validated in a separate study.</li><li>Studies reporting impact assessment of a prognostic model.</li></ul> <p><i>Models that were internally validated only were excluded.</i></p> |
